# Supplementary material for: Self-assembly of alkyl–perylenebisdiimide–DNA amphiphiles and control of their morphology through cyclodextrin-based host–guest interaction
Source: Royal Society of Chemistry journal article supplement (doi:10.1039/d2sm01555b), 2022-12-12
Supplement: d2sm01555b1.pdf [file d2sm01555b1.pdf]

## Supporting Information

### **Self-Assembly of Alkyl-Perylenebisdiimide–DNA Amphiphiles and Control of Its Morphology through Cyclodextrin-based Host–Guest Interaction**

Jinyu Gao, Jiahui Ma, Cheng Deng, Hai Yang, Simin Liu and Zhiyong Zhao\*

Key Laboratory of Hubei Province for Coal Conversion and New Carbon Materials, School of Chemistry and Chemical Engineering, Wuhan University of Science and Technology, Wuhan 430081, China

#### **Table of Contents**

|                                                                                     |                  |
|-------------------------------------------------------------------------------------|------------------|
| <b>1. Materials and Methods .....</b>                                               | <b><u>1</u></b>  |
| <b>2. Synthesis and Characterization of D18–PDIol Amphiphiles. ....</b>             | <b>3</b>         |
| <b>3. Self-Assembly of D18–PDIol Amphiphiles at Different Conditions.....</b>       | <b>6</b>         |
| <b>4. Morphology Regulation of D18–PDIol through Host-Guest Interaction.....</b>    | <b>7</b>         |
| <b>5. The Reversible Transformation of the Assemblies .....</b>                     | <b>9</b>         |
| <b>6. Characterization of 5 nm Gold Nanoparticles Decorated on Assemblies .....</b> | <b>11</b>        |
| <b><u>Reference .....</u></b>                                                       | <b><u>11</u></b> |

## 1. Materials and Methods

All the materials were obtained from commercial suppliers and were used without further purification, unless otherwise stated. Perylene-3,4,9,10-tetracarboxylic dianhydride, isooctyl amine, (S)-3-amino-1,2-propanediol, 5-ethylthiolotetrazole, 4,4-dimethoxy triphenylmethyl chloride and 2-cyanoethyl-N,N-diisopropyl chlorophosphoride were purchased from energy-chemical. All of the DNA sequences were obtained from IDOBIO Company (Beijing, China). The water used in all of the experiments was Milli Q deionized water (18.2 MΩ.cm).

DNA sequences:

CPG-D18: 5'-OH-TACTACACCACCACAACA-3'

Complementary DNA: 5'- HS-TGTTGTGGTGGTGTA-3'

Non-complementary DNA: 5'-HS-TTCATCTTTCACCTA-3'

**Matrix-assisted laser desorption-ionization (time of flight) mass spectrometry (MALDI-TOF):** MALDI-TOF was performed on a Bruker Biflex III MALDI-TOF spectrometer. Samples were dissolved in 50 μL Milli-Q water at a concentration of 30 μM.

**TEM measurements:** The sample was applied to a carbon grid by adding a 7 μL drop of sample solution to the grid and carefully removed by using a filter paper after 2 min immersion. The grid was allowed to dry for at least 15 min before applying 7 μL of a 1 wt% uranyl acetate aqueous solution, which was removed after 20 s. The grid was allowed to dry for at least 15 min again. Samples were studied on a JEOL JEM-2100 TEM (Jeol, Japan).

**Dynamic light scattering (DLS) experiments:** The experiments were performed on Nicomp 380 Z3000. The volume of the samples were 100 μL. The number of cycles of each sample was 3 times, and the time of each cycle was 3 minutes.

**Fluorescence measurements:** The fluorescence spectra were recorded at room temperature in a quartz cuvette on a PerkinElmer SL-55 Fluorescence Spectrometer. The excitation wavelength was 505 nm, and the emission wavelengths were in the range from 530 to 750 nm with excitation slits of 5 nm and emission slits of 20 nm.

**UV/Vis measurements:** The experiments were performed on a SHIMADZU UV-3600 instrument with 1 cm pathlength cells at 298 K.

**$^1\text{H}$  NMR measurements:** All  $^1\text{H}$  NMR spectra were collected on Agilent 600 MHz  $\text{CDCl}_3$ .

**General procedure for preparation of DNA modified AuNPs<sup>1</sup>:**

A solution of DNA (10  $\mu\text{M}$ , 45.48  $\mu\text{L}$ ) was added into the 5 nm AuNPs (22.74 nM, 100  $\mu\text{L}$ ) solution. 3  $\mu\text{L}$  5  $\times$  TBE buffer and 1.52  $\mu\text{L}$   $\text{H}_2\text{O}$  were added. And then, adding different volumes of NaCl solution (2 M) in turn, the concentration of sodium chloride in the solution gradually increased from 50 mM to 300 mM. The mixed solution was incubated at room temperature overnight and then centrifugation at 15 000 r/s for 15 min to remove the free DNA. After removing the supernatant, the dark-red precipitate was washed three times with pH 8.0, 0.1  $\times$  TBE buffer containing 100 mM NaCl by successive centrifugation and finally re-dispersed in 7  $\mu\text{L}$  fresh pH 8.0, 10 mM NaCl, 0.1  $\times$  TBE buffer.

**Hybridization process:**

109.1 nM (7  $\mu\text{L}$ ) complementary DNA modified AuNPs were incubated with D18-PDIol micelles solution (2  $\mu\text{L}$ ) and D18-PDIol@ $\beta$ -CD nanofibers solution (2  $\mu\text{L}$ ) in 0.1  $\times$  TBE (pH 8.0) buffer at room temperature overnight, respectively. As a control, non-complementary DNA modified AuNPs experiments were conducted with same treatment as the complementary DNA.

## 2. Synthesis and Characterization of D18–PDliol Amphiphiles

### 2.1 Synthesis of D18–PDliol Amphiphiles

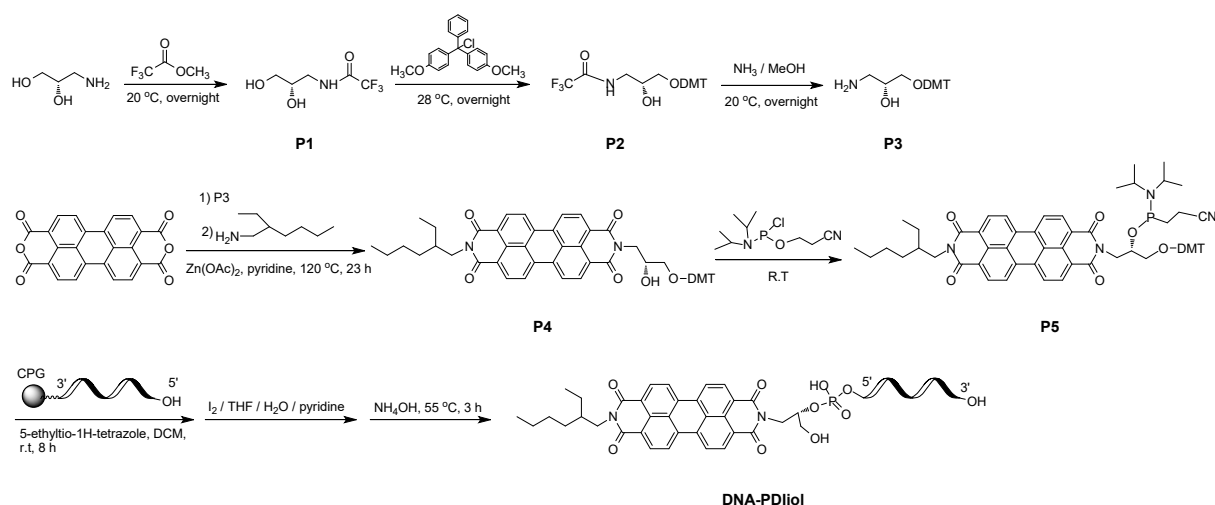

**Scheme S1.** Synthetic route of D18–PDliol conjugates

Compounds P3 was synthesized according to the related literatures.<sup>2a</sup> <sup>1</sup>H NMR (600 MHz,  $\text{CDCl}_3$ , 298K):  $\delta$  7.40-7.36 (m, 2H), 7.25 (dd,  $J = 22.7, 81$  Hz, 6H), 7.16 (t,  $J = 7.3$  Hz, 1H), 6.78 (d,  $J = 8.6$  Hz, 4H), 3.82 (dp,  $J = 9.1, 5.3, 4.8$  Hz, 1H), 3.73 (s, 6H), 3.43 (s, 2H), 3.10 (d,  $J = 5.2$  Hz, 2H), 2.91-2.71 (m, 2H).

Compounds P4 were synthesized according to the related literatures.<sup>2b</sup> <sup>1</sup>H NMR (600 MHz,  $\text{CDCl}_3$ , 298K):  $\delta$  8.64 (d,  $J = 7.9$  Hz, 4H), 8.55 (dd,  $J = 8.1, 4.2$  Hz, 4H), 7.48 (d,  $J = 7.8$  Hz, 2H), 7.35 (dd,  $J = 8.9, 2.7$  Hz, 4H), 7.27 (t,  $J = 7.6$  Hz, 2H), 6.81 (dd,  $J = 9.0, 2.9$  Hz, 4H), 4.64 (dd,  $J = 13.8, 9.3$  Hz, 1H), 4.31 (dd,  $J = 13.9, 3.4$  Hz, 1H), 4.23 (s, 1H), 4.19 – 4.09 (m, 3H), 3.76 (d,  $J = 2.3$  Hz, 6H), 3.18 (q,  $J = 6.0$  Hz, 2H), 1.97 (s, 2H), 1.31 (q,  $J = 6.7, 6.0$  Hz, 8H), 0.88 (dd,  $J = 8.7, 5.9$  Hz, 9H).

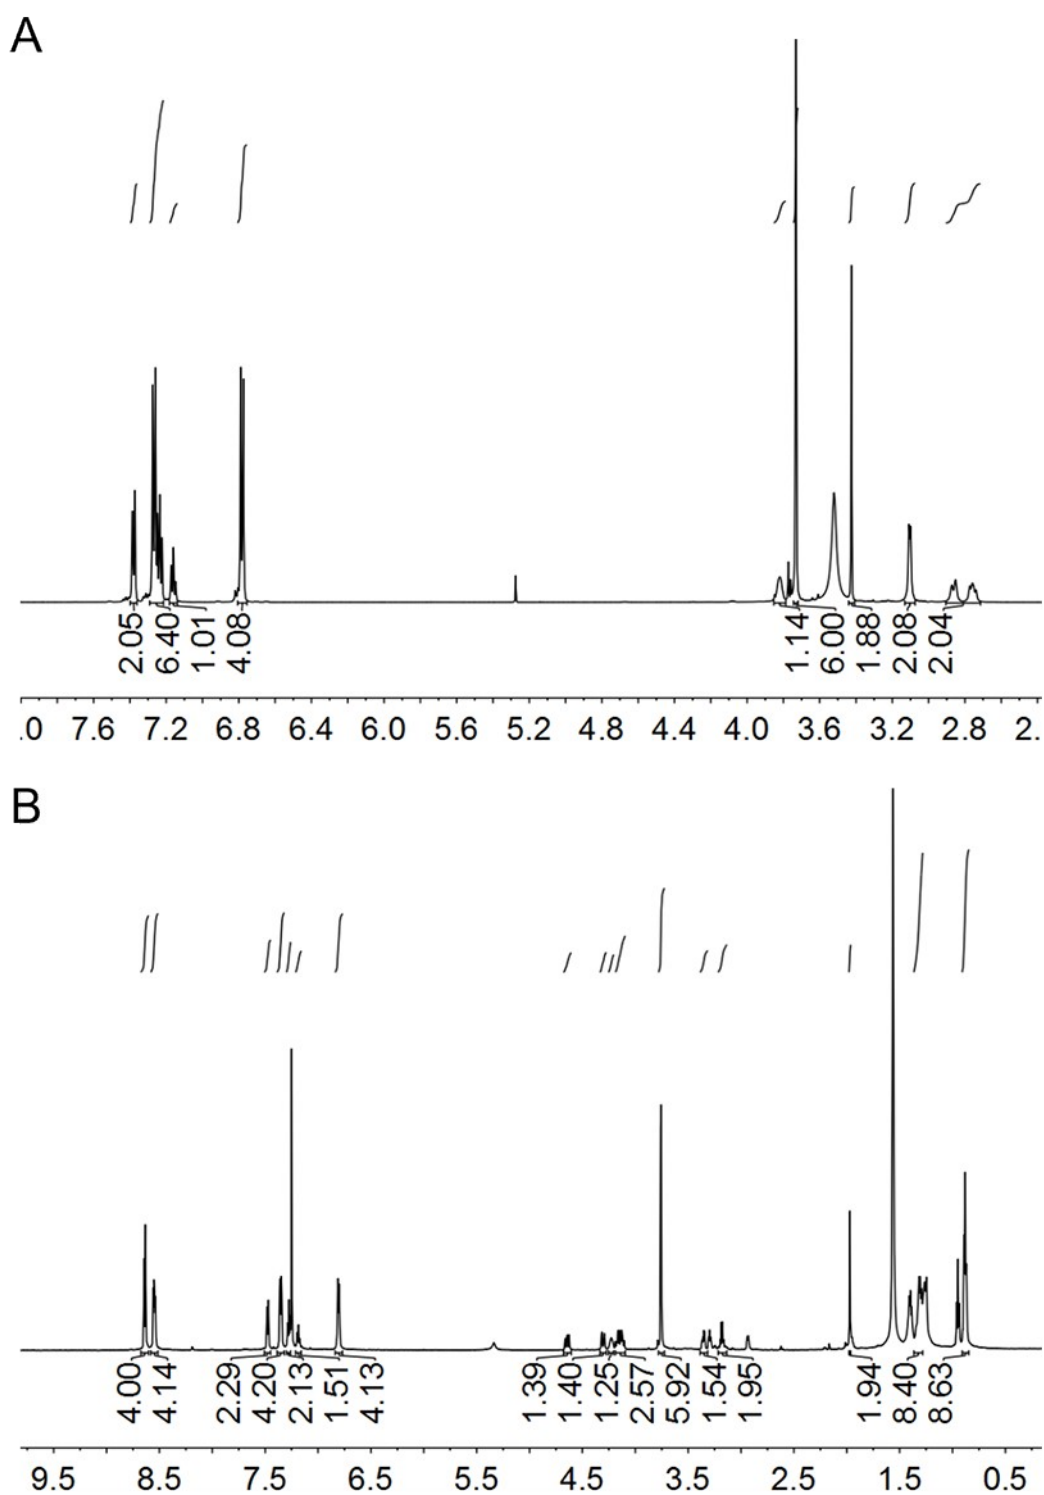

**Figure S1.**  $^1\text{H}$ NMR (600 MHz,  $\text{CDCl}_3$ , 298K) of compound P3(A) and P4(B).

Compounds D18–PDIol were synthesized according to the related literature.<sup>3</sup>

Weighed 0.176 g of **P4** in a 24-necked round-bottom flask, vacuum and charge with argon. *N,N*-diisopropylethylamine (0.170 mL, 1 mmol) and 2-cyanoethyl diisopropyl chlorophosphoramidite (0.140 mL, 0.6 mmol) were added under argon atmosphere and stirred for one hour at room

temperature. After the reaction was finished, saturated  $\text{NaHCO}_3$  was added for quenching, which was extracted with saturated  $\text{NaHCO}_3$ , distilled water and saturated  $\text{NaCl}$  solution, respectively, and then spin-dried in argon atmosphere to obtain product **P5**.

CPG-attached oligodeoxynucleotide chain (0.002 mmol) and ethylthiotetrazole (26.03 mg, 0.2 mmol) were added into a 10 mL pear-shaped bottle, vacuumed and filled with argon. 2 mL anhydrous and anaerobic dichloromethane was added into the product **P5** under argon atmosphere, then the solution was added into the pear-shaped bottle filled with DNA under argon atmosphere and sonicated for one minute. The mixture was allowed to stand overnight under argon atmosphere. After the reaction, it was washed with dichloromethane, acetonitrile and oxidized with  $\text{I}_2/\text{THF}/\text{Py}$  for 2 minutes, then washed with acetonitrile until the supernatant was colorless. Finally, the CPG-attached oligodeoxynucleotide was cleaved by concentrated ammonia solution in  $55\text{ }^\circ\text{C}$  for 3 h.

## 2.2 Characterization of D18–PDIol Amphiphiles

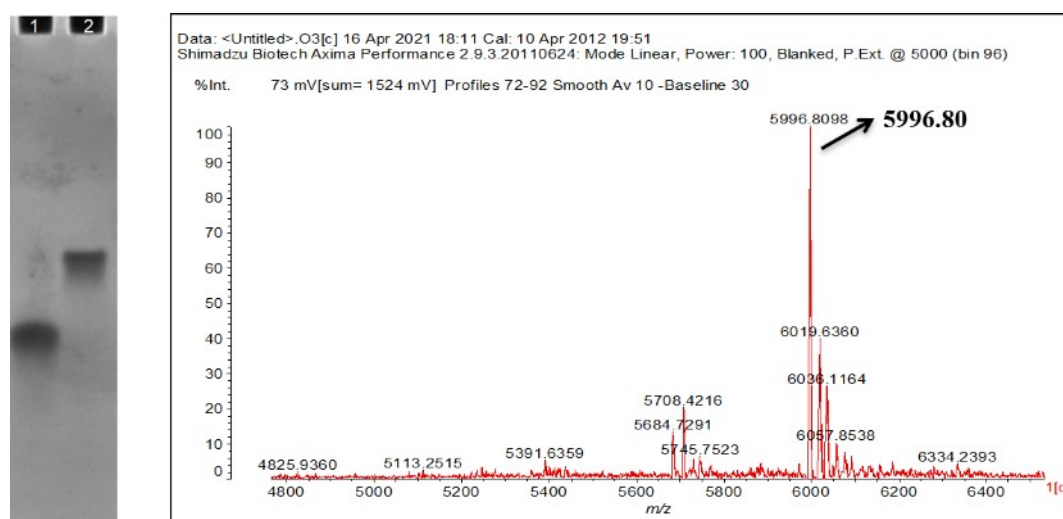

**Figure S2.** Left: characterization of D18–PDIol conjugates by 20% denaturing PAGE. Lane 1: D18, Lane 2: D18–PDIol conjugates. Right: characterization of D18–PDIol conjugates by MALDI-TOF mass spectrometer and the molecular weight was found to be 5996.80 (Calculated: 5988.12 m/z).

### 3. Self-Assembly of D18–PDIol Amphiphiles at Different Conditions

#### 3.1 The self-assembly behavior of D18–PDIol through the Addition of different solvents

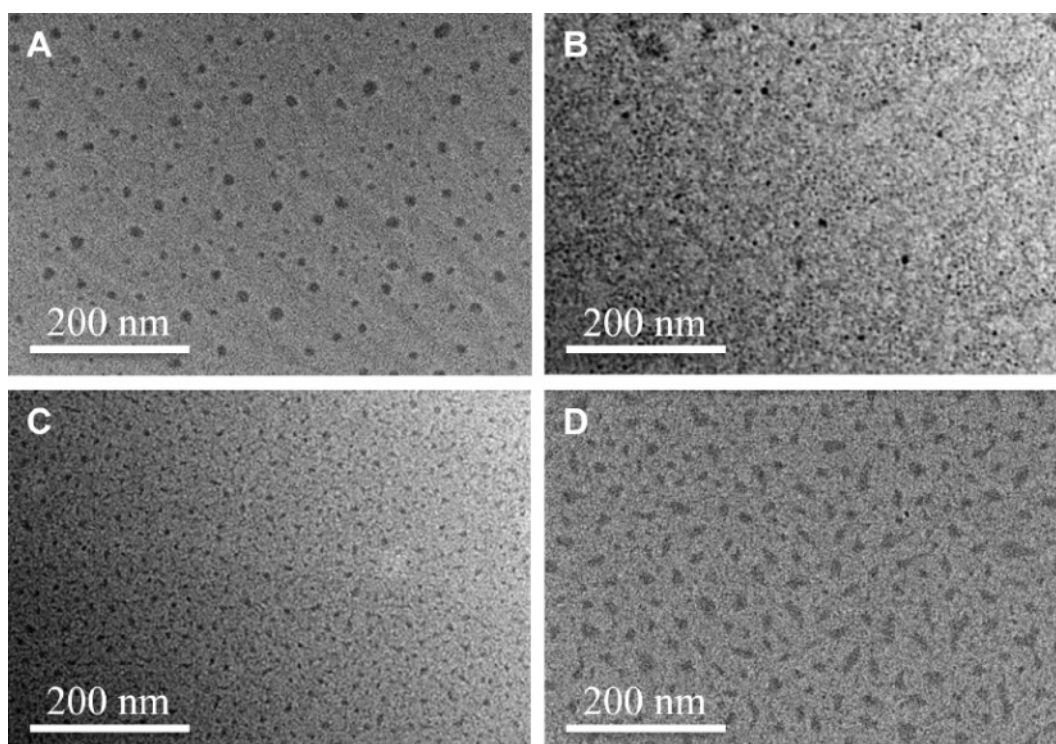

**Figure S3.** TEM images of D18–PDIol amphiphiles at different conditions. (A) THF/H<sub>2</sub>O, v/v, 1:20, (B) DCM/ H<sub>2</sub>O, v/v, 1:20, (C) CH<sub>3</sub>CN/ H<sub>2</sub>O, v/v, 1:20 and (D) THF/ H<sub>2</sub>O, v/v, 1:10.

#### 3.2 The CMC of D18–PDIol conjugates

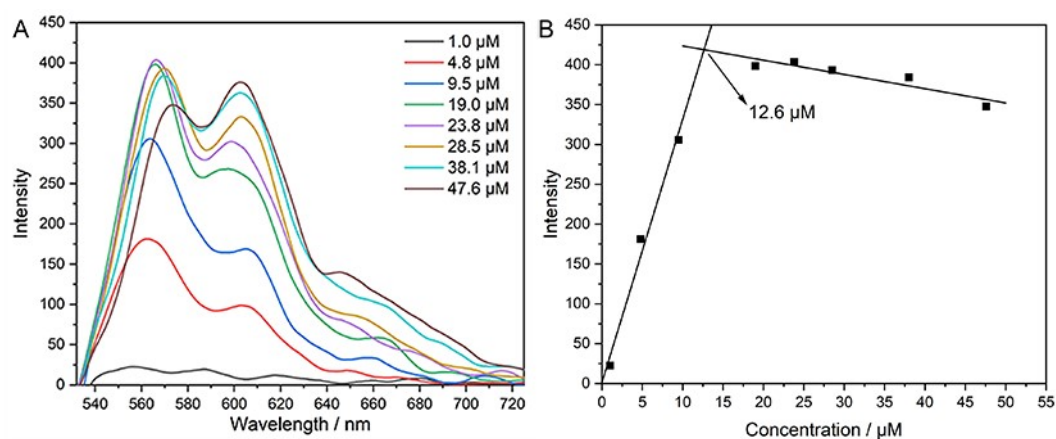

**Figure S4.** (A) Fluorescence spectra of D18–PDIol assemblies at different concentrations. (B) Determination of the critical micelle formation concentration (CMC) of D18–PDIol and the fluorescence intensity of PDI as a function of the concentration of D18–PDIol.

## 4. Morphology Regulation of D18–PDliol through Host–Guest Interaction

### 4.1 Morphology Regulation of D18–PDliol through Addition of $\beta$ -CD

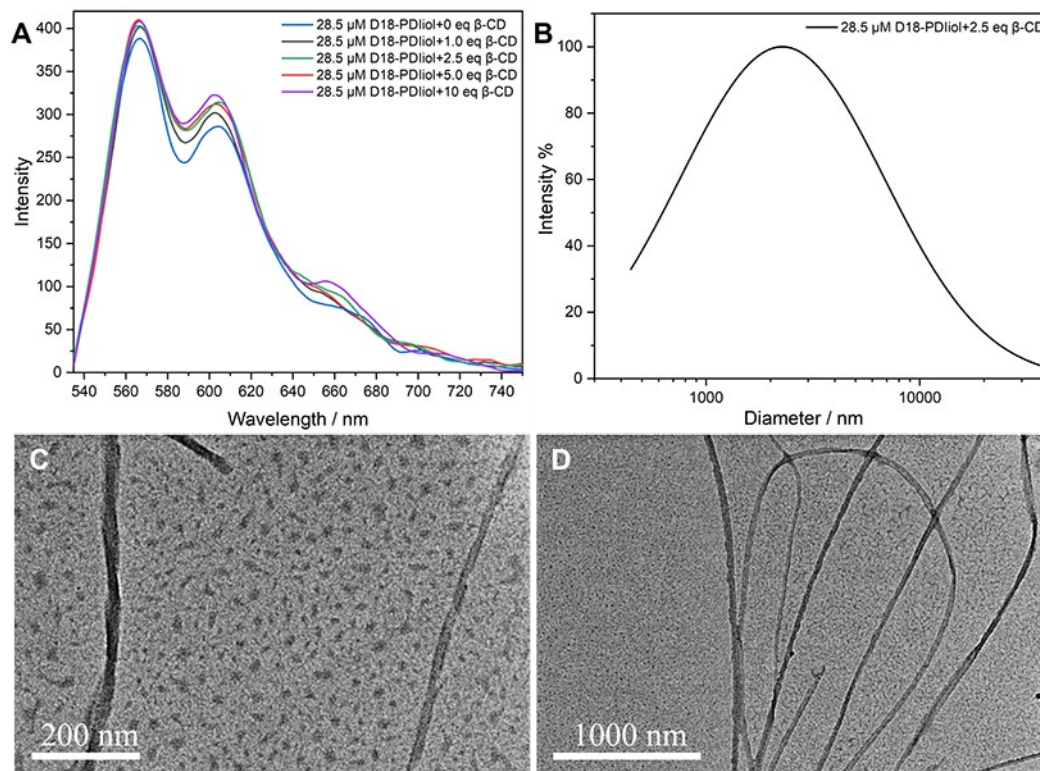

**Figure S5.** (A) Fluorescence spectra of D18-PDliol upon addition of different equivalent  $\beta$ -CD. (B) DLS size distribution of the assembled D18-PDliol micelles with the addition of 2.5 equivalent of  $\beta$ -CD. (C and D) TEM images of assembled D18-PDliol micelles with the addition of 1 equiv.  $\beta$ -CD. (Annealing process: The sample was heated to 90 °C and maintained for 30 min, then cooled slowly to room temperature and maintained overnight.)



#### 4.2 Morphology Regulation of D18–PDiol Assemblies through Addition of $\alpha$ -CD

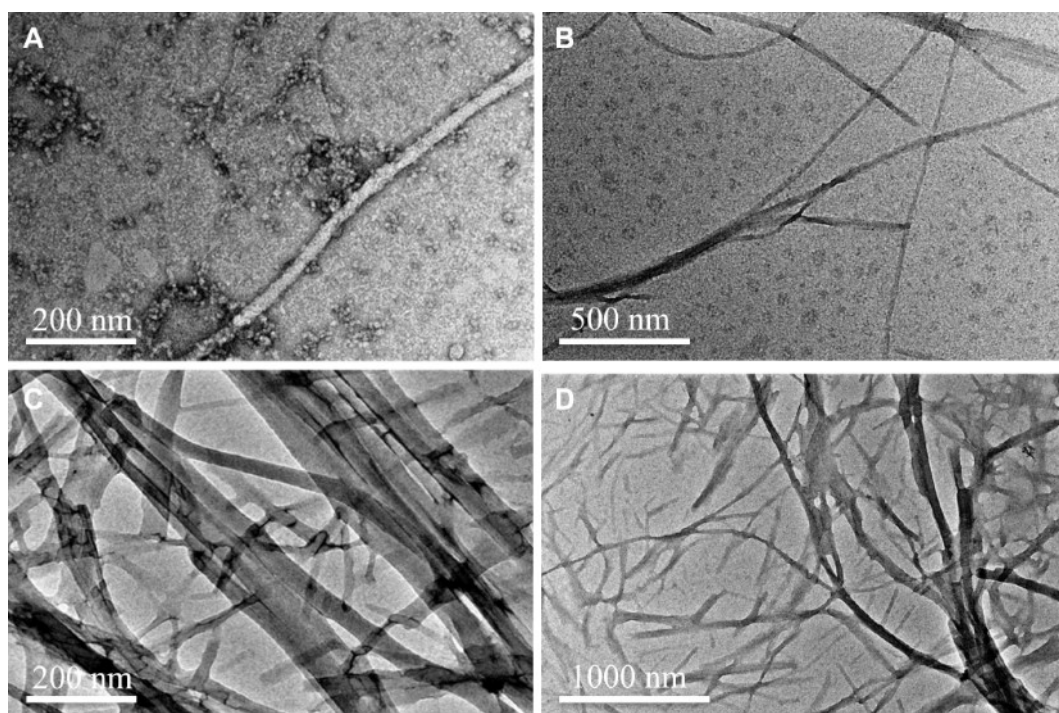

**Figure S6.** TEM images of assembled D18–PDiol micelles with the addition of 1 equiv.  $\alpha$ -CD (A, B) and 2.5 equiv.  $\alpha$ -CD (C, D). (Annealing process: The sample was heated to 90 °C and maintained for 30 min, then cooled slowly to room temperature and maintained overnight.)

## 5. The Reversible Transformation of the Assemblies

### 5.1 Fluorescence spectra of D18-PDIol, D18-PDIol@ $\beta$ -CD and D18-PDIol@ $\beta$ -CD with the addition of AMA

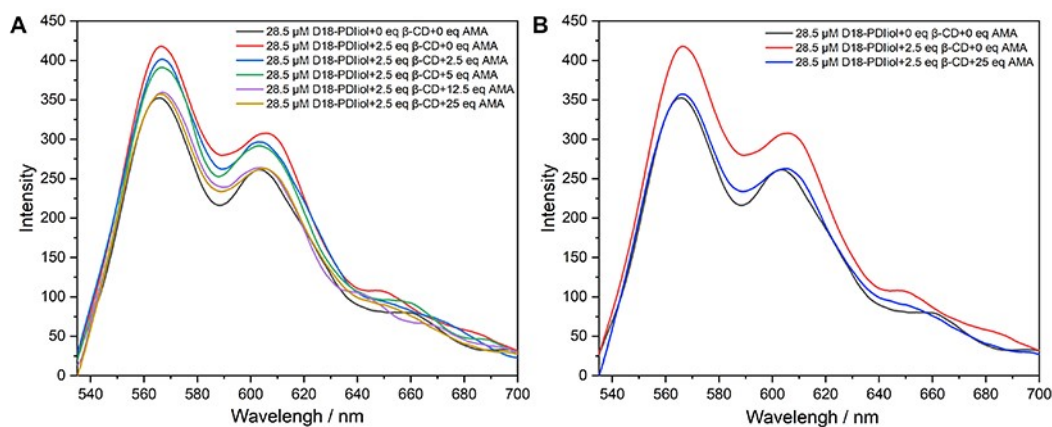

**Figure S7** (A) Fluorescence spectra of D18-PDIol, D18-PDIol@ $\beta$ -CD and D18-PDIol@ $\beta$ -CD with the addition of different equivalent AMA. (B) Fluorescence spectra of D18-PDIol, D18-PDIol@ $\beta$ -CD and D18-PDIol@ $\beta$ -CD+25 equivalent of AMA.

### 5.2 D18-PDIol@ $\beta$ -CD nanofibers with the addition of AMA (25 equiv.) and maintained at room temperature overnight

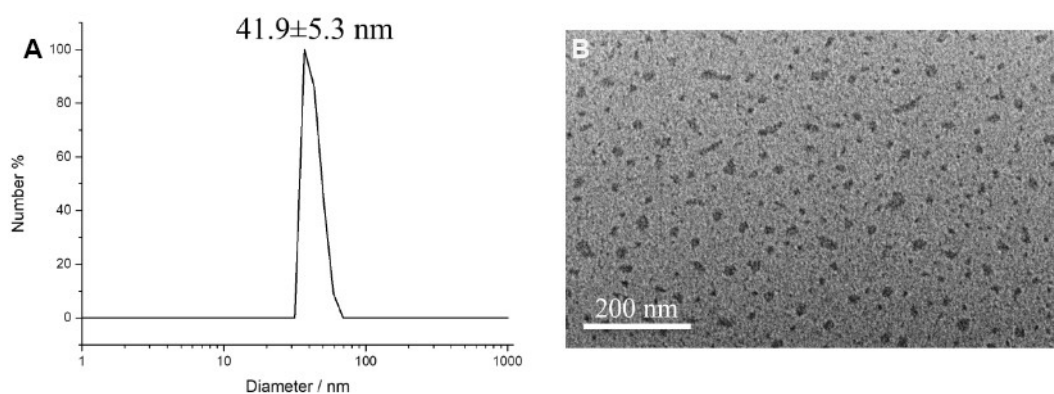

**Figure S8.** DLS size distribution (A) and TEM image (B) of 28.5  $\mu$ M D18-PDIol@ $\beta$ -CD nanofibers with the addition of AMA (25 equiv.).

### 5.3 D18–PDliol assemblies with the addition of AMA (25 equiv.).

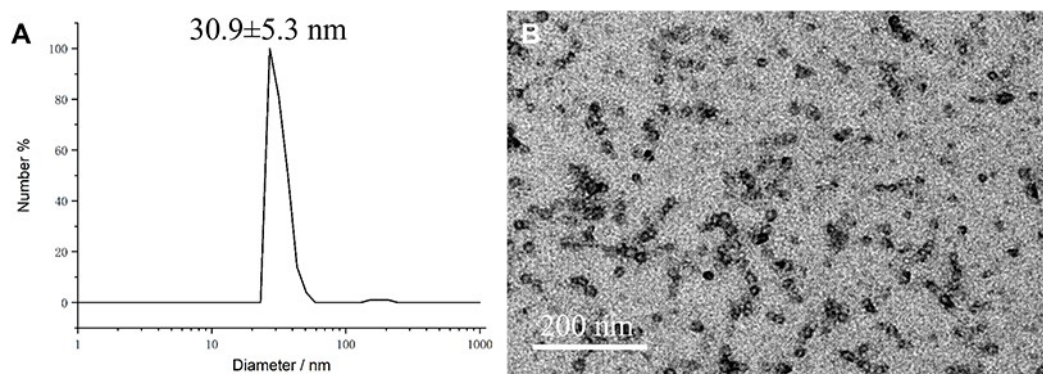

**Figure S9.** DLS size distribution (A) and TEM image (B) of 28.5  $\mu$ M D18–PDliol assemblies with the addition of AMA (25 equiv.).

## 6. Characterization of 5 nm Gold Nanoparticles Decorated on Assemblies

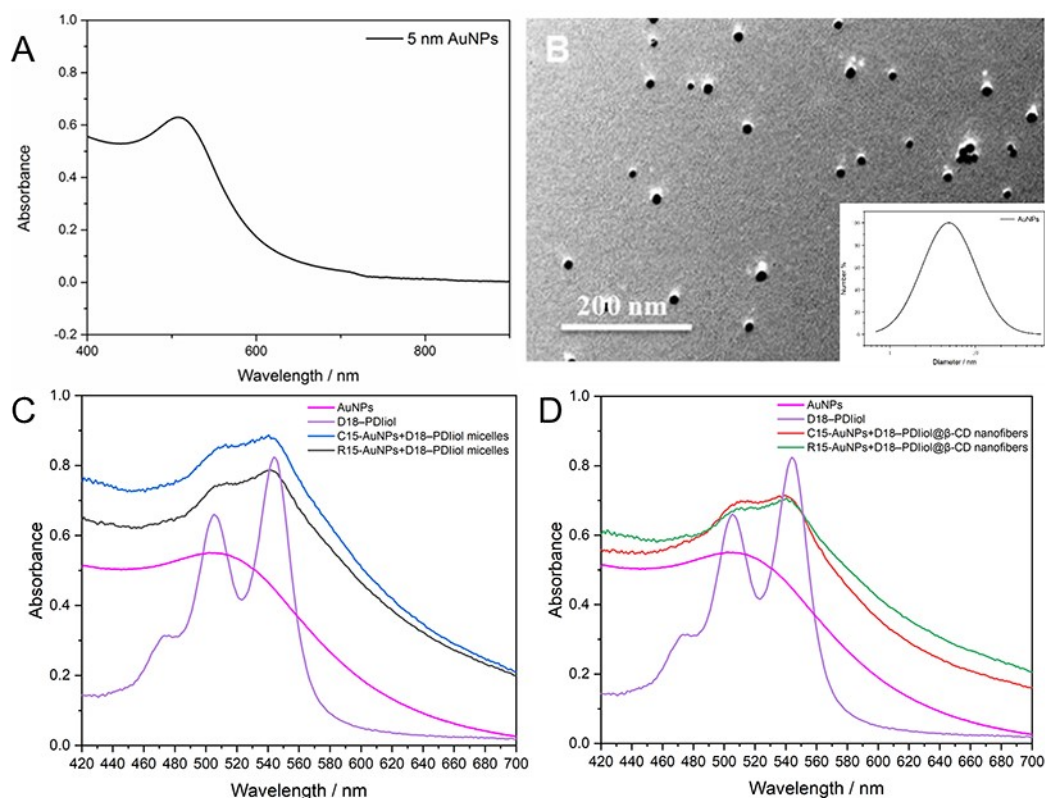

**Figure S10.** (A) UV-Vis absorption spectral of 5 nm AuNPs. (B) TEM image of 5 nm AuNPs. Inset: DLS size distribution of 5 nm AuNPs. (C) UV-Vis absorption spectral of 5 nm AuNPs, D18-PDIol, complementary DNA(D15) modified AuNPs with D18-PDIol micelles and non-complementary DNA(R15) modified AuNPs with D18-PDIol micelles. (D) UV-Vis absorption spectral of 5 nm AuNPs, D18-PDIol, complementary DNA(D15) modified AuNPs with D18-PDIol@β-CD nanofibers and non-complementary DNA(R15) modified AuNPs with D18-PDIol@β-CD nanofibers.

## Reference

- 1 Z. Zhao, C. Chen, Y. Dong, Z. Yang, Q. H. Fan, D. Liu, *Angew. Chem. Int. Ed.* 2014, **53**, 13468–13470.
- 2 (a) A. V. Azhayev, M. L. Antopolsky, *Tetrahedron* 2001, **57**, 4977–4986; (b) C. H. Wohlgamuth, M. A. McWilliams, A. Mazaheripour, A. M. Burke, K.-Y. Lin, L. Doan, J. D. Slinker, A. A. Gorodetsky, *J. Phys. Chem. C* 2014, **118**, 29084–29090.
- 3 F. Menacher, V. Stepanenko, F. Wurthner, H. A. Wagenknecht, *Chem. Eur. J.* 2011, **17**, 6683–6688.
